# Supplementary material for: Programmatic introduction of parenchymal cell types into blood vessel organoids
Source: PubMed Central journal article supplement — Stem Cell Reports. 2021 Sep 23;16(10):2432–41. doi: 10.1016/j.stemcr.2021.08.014 (PMC8515093; doi:10.1016/j.stemcr.2021.08.014), 2021-09-23
Supplement: mmc1.pdf [file mmc1.pdf]

**Stem Cell Reports, Volume 16**

**Supplemental Information**

**Programmatic introduction of parenchymal cell types into blood vessel organoids**

**Amir Dailamy, Udit Parekh, Dhruva Katrekar, Aditya Kumar, Daniella McDonald, Ana Moreno, Pegah Bagheri, Tse Nga Ng, and Prashant Mali**

## SUPPLEMENTARY INFORMATION

### **Programmatic Introduction of Parenchymal Cell Types into Blood Vessel Organoids**

*Amir Dailamy\*<sup>a</sup>, Udit Parekh\*<sup>b</sup>, Dhruva Katrekar<sup>a</sup>, Aditya Kumar<sup>a</sup>, Daniella McDonald<sup>c</sup>, Ana Moreno<sup>a,d</sup>, Pegah Bagheri<sup>a</sup>, Tse Nga Ng<sup>b</sup>, Prashant Mali<sup>†,a</sup>*

*<sup>a</sup>Department of Bioengineering, University of California San Diego, CA 92093, USA.*

*<sup>b</sup>Department of Electrical and Computer Engineering, University of California San Diego, CA 92093, USA.*

*<sup>c</sup>Biomedical Sciences Graduate Program, University of California San Diego, CA 92093, USA.*

*<sup>d</sup>Present address: Navega Therapeutics, San Diego, CA 92121, USA.*

*\*These authors contributed equally. <sup>†</sup>Correspondence: pmali@ucsd.edu.*

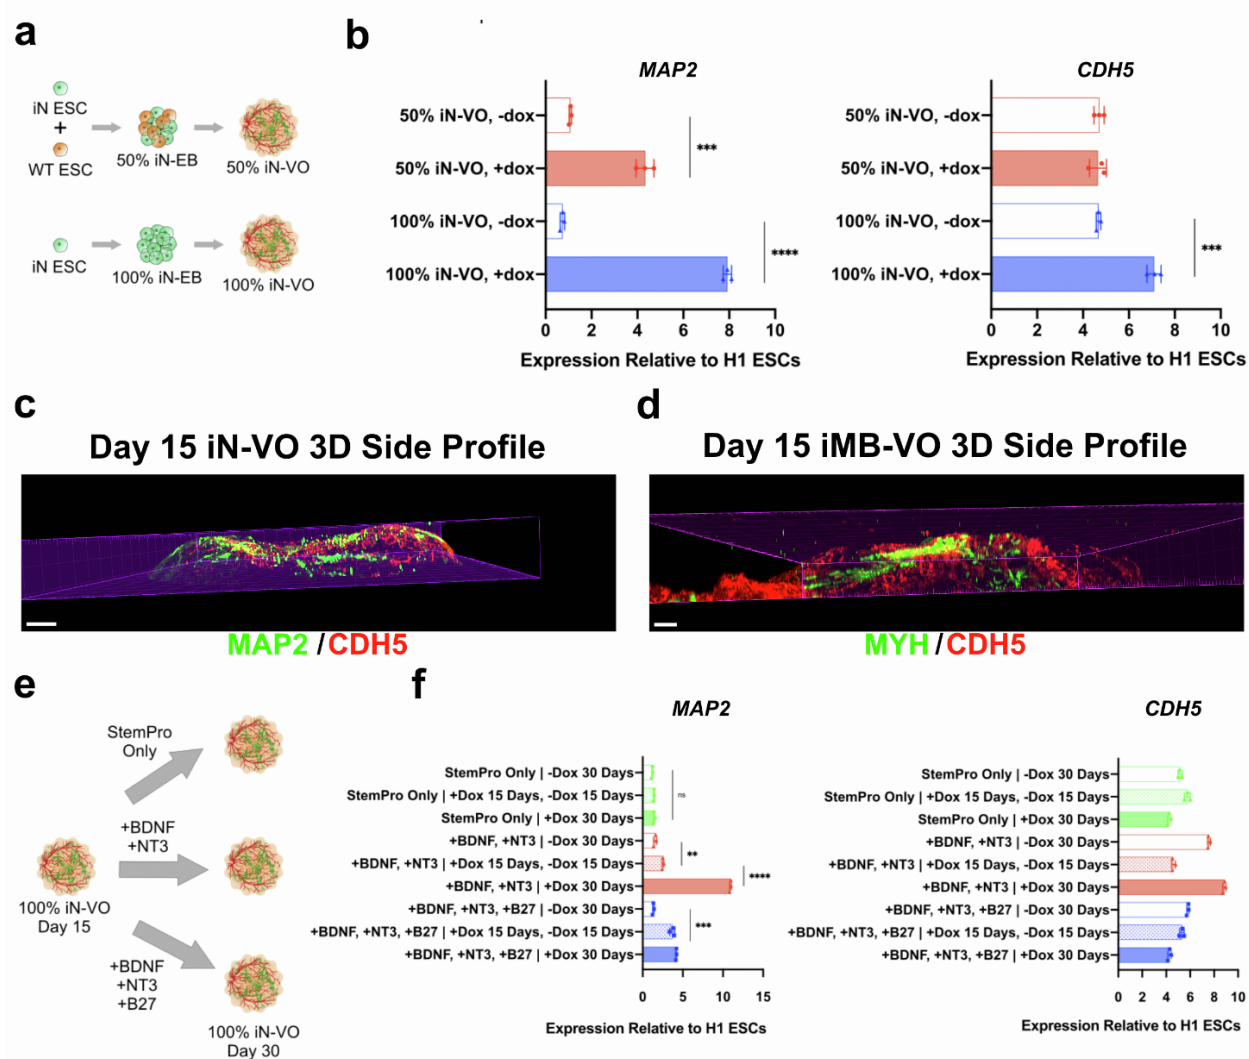

**Figure S1: Optimization of organoid culture conditions.** (a) Schematic for experiment to assess the optimal ratio of iN to WT cells for iN-VO formation. (b) qRT-PCR analysis of signature neuronal gene *MAP2*, and signature endothelial gene *CDH5*, at day 15 of culture for organoids grown from 50% and 100% iN cells. Data represent the mean  $\pm$  s.d. ( $n = 3$  organoids) and the unpaired two-tailed t-test was used for all comparisons. (c) Side profile 3D rendering of a pan-organoid tile-scan, z-stack immunofluorescence confocal micrograph of a *CDH5*- and *MAP2*-labelled day 15 neuro-vascular organoid (Scale bars = 150  $\mu$ m). (d) Side profile 3D rendering of a pan-organoid tile-scan, z-stack immunofluorescence confocal micrograph of *CDH5*- and *MYH*-labelled day 15 myo-vascular organoid (Scale bars = 150  $\mu$ m). (e) Schematic for experiment to

assess optimal media supplements for long term iN-VO culture. **(f)** qRT-PCR analysis of signature neuronal gene *MAP2*, and signature endothelial gene *CDH5*, at day 30 of culture to assess long term neuronal and endothelial survival. Data represent the mean  $\pm$  s.d. (n = 3 organoids) and the unpaired two-tailed t-test was used for all comparisons. **(b,f)** Statistical significance was attributed to  $P < 0.05$  as determined by unpaired two-tailed t-test comparisons. (\*\* $P \leq 0.01$ , \*\*\* $P \leq 0.001$ , and \*\*\*\* $P \leq 0.0001$ ; ns = not significant).

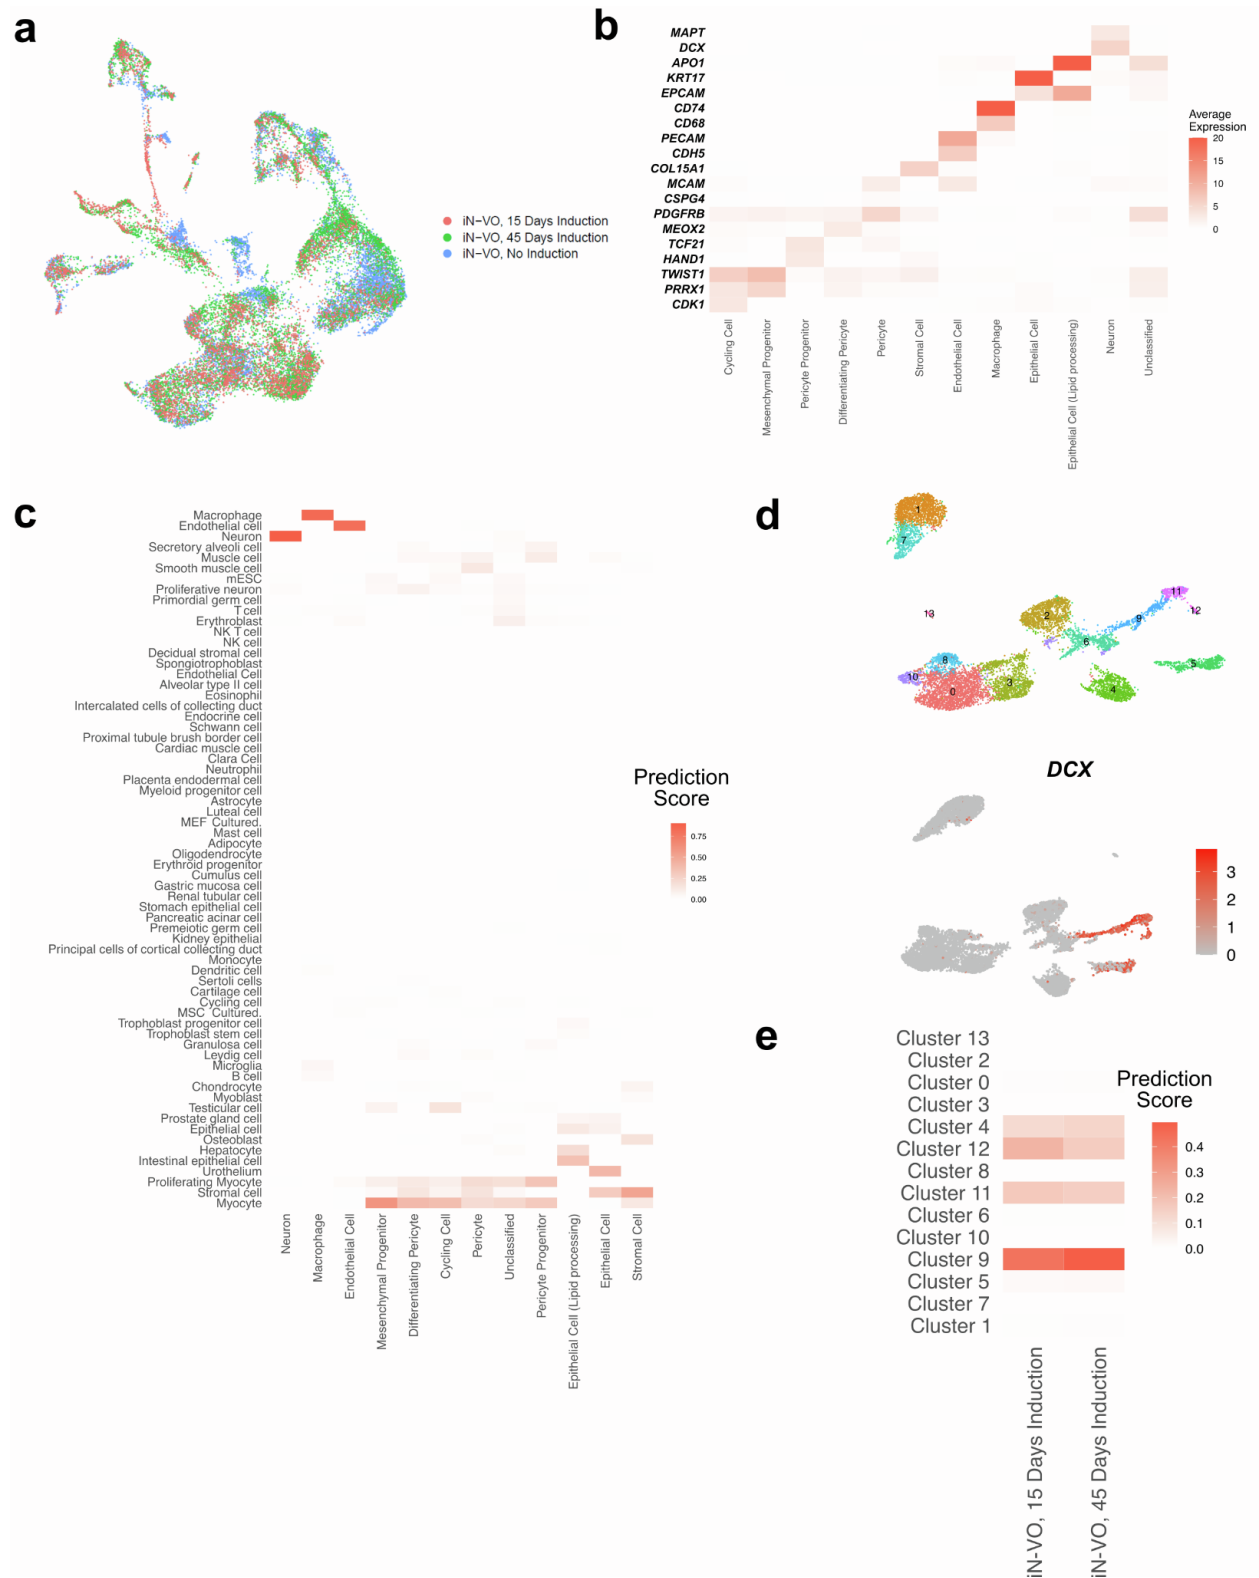

**Figure S2: scRNA-seq characterization of neurovascular organoids. (a)** UMAP visualization of iN-VO clusters annotated by sample type. Two independent induction conditions, along with

one non-induction condition. **(b)** Expression of marker genes for each classified cell type. **(c)** Mapping of neurovascular organoid cell types to cell types in the mouse cell atlas (Han et al. 2018). **(d)** UMAP visualization of clusters from a reference dataset of cells profiled during 2D differentiation of neurons from pluripotent stem cells by *NGN2* overexpression (Schörnig et al. 2021). Cells were profiled at day 14 and day 35 after induction. Neuronal clusters in the 2D differentiated neurons are highlighted below by overlaying *DCX* expression on the UMAP visualization. **(e)** Mapping of neurovascular organoid neurons to clusters in the 2D differentiated neurons.

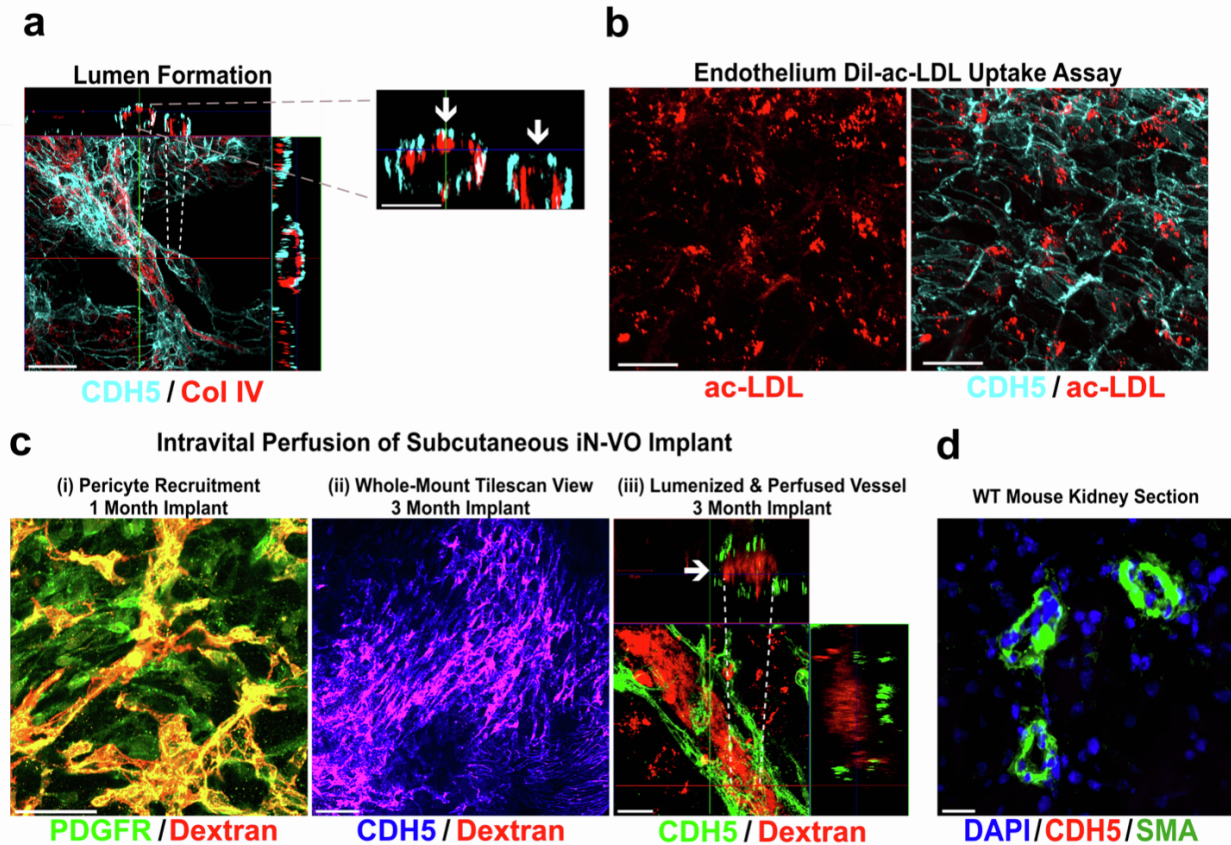

**Figure S3: Extensive molecular and phenotypic characterization of long-term cultured iN-VOs.** (a) The left image shows orthogonal sections of confocal stacks from neuro-vascular organoids stained for *CDH5* (red) and *Col IV* (Scale bars = 50  $\mu\text{m}$ ). The right image shows a zoomed in view of formed lumens, as indicated with arrowheads (Scale bars = 25  $\mu\text{m}$ ). (b) Immunofluorescence 100  $\mu\text{m}$  z-stack, maximum projection, confocal micrographs of Day 30 neuro-vascular organoids labelled for *CDH5* post Dil-ac-LDL endothelial uptake assay (Scale bars = 50  $\mu\text{m}$ ). (c) Further characterization of endothelial functionality *in vivo* via intravital perfusion shows: (i) Experimental validation of pericyte recruitment of *in vivo* perfused neuro-vascular organoids, showing immunofluorescence micrograph of intravital Dextran and *PDGFRB* overlay (Scale bar = 50  $\mu\text{m}$ ); (ii) 100  $\mu\text{m}$  z-stack projection that spans a 650 x 650  $\mu\text{m}$  tilescan region of whole-mount neuro-vascular organoid implant showing intravital Dextran and *CDH5* overlay (Scale bar = 100  $\mu\text{m}$ ); and (iii) Orthogonal sections of confocal stacks from neuro-vascular organoids implants 90 days post-implantation, stained for *CDH5* (green) and showing dextran

perfused within the vessel. Lumens are indicated with arrowheads (Scale bars = 20  $\mu\text{m}$ ). **(d)** Wild-type mouse kidney stained for human-specific anti-*CDH5* and anti-*SMA* antibodies. Note the absence of the *CDH5* signal (Scale bar = 10  $\mu\text{m}$ ).



## **SUPPLEMENTAL MULTIMEDIA FILES**

**Supplemental Movie 1:** 200  $\mu\text{m}$  Z-stack playback of a day 15 neuro-vascular organoid confocal tile-scan micrograph. Organoid is stained for *CDH5* (red) and *MAP2* (green).

**Supplemental Movie 2:** 200  $\mu\text{m}$  Z-stack playback of a day 15 myo-vascular organoid confocal tile-scan micrograph. Organoid is stained for *CDH5* (red) and *MYH* (green).

**Supplemental Movie 3:** 3D rendering of 200  $\mu\text{m}$  Z-stack confocal tile-scan micrograph of a day 15 neuro-vascular organoid. Organoid is stained for *CDH5* (red) and *MAP2* (green). (Scale bar = 100  $\mu\text{m}$ )

**Supplemental Movie 4:** 3D rendering of 200  $\mu\text{m}$  Z-stack confocal tile-scan micrograph of a day 15 myo-vascular organoid. Organoid is stained for *CDH5* (red) and *MYH* (green). (Scale bar = 100  $\mu\text{m}$ )

## SUPPLEMENTAL EXPERIMENTAL PROCEDURES

### Plasmid Construction

The piggyBac transposon plasmids for inducible overexpression of TFs were constructed using the backbone from 138-dCas9-Dnmt3a (Addgene Plasmid #84570) (Liu et al. 2016). The backbone plasmid was digested with NdeI and NsiI to remove the neomycin resistance cassette and was replaced with a puromycin resistance cassette using multi-element Gibson assembly. This puromycin resistant plasmid was then digested with NheI and AgeI to remove the dCas9-DNMT3A fusion sequence and replaced with the TF and fluorescent protein sequences separated by 2A peptide sequences using a multi-element Gibson assembly. TF and fluorescent protein sequences were amplified from plasmids: EF1a\_NEUROD1\_P2A\_Hygro\_Barcode (Addgene Plasmid #120466), EF1a\_ASCL1\_P2A\_Hygro\_Barcode (Addgene Plasmid #120427), pHDLX2\_N174 (Addgene Plasmid #60860) (Victor et al. 2014), EF1a\_MYOD1\_P2A\_Hygro\_Barcode (Addgene Plasmid #120464), pBS-hBAF60C (Addgene Plasmid #21036) (Wang et al. 1996), EF1a\_mCherry\_P2A\_Hygro\_Barcode (Addgene Plasmid #120426), and pEGIP (Addgene Plasmid #26777).

To construct a plasmid expressing the hyperactive piggyBac transposase (Yusa et al. 2011), the sequence for the enzyme was obtained as a synthesized double-stranded DNA fragment (Integrated DNA Technologies). This was cloned into an in-house plasmid using Gibson assembly, such that the expression of the transposase is driven by a CAG promoter.

The Gibson assembly reactions were set up as follows: 100 ng digested backbone, 3:10 molar ratio of insert, 2X Gibson assembly master mix (New England Biolabs), H<sub>2</sub>O up to 20  $\mu$ l. After incubation at 50 °C for 1 h, the product was transformed into One Shot Stbl3 chemically competent *Escherichia coli* (Invitrogen). A fraction (150  $\mu$ l) of cultures was spread on carbenicillin (50  $\mu$ g/ml) LB plates and incubated overnight at 37 °C. Individual colonies were picked, introduced into 5 ml

of carbenicillin (50 µg/ml) LB medium and incubated overnight in a shaker at 37 °C. The plasmid DNA was then extracted with a QIAprep Spin Miniprep Kit (Qiagen), and Sanger sequenced to verify correct assembly of the vector. Following verification of the vector, larger amounts of plasmid were obtained by seeding 150 µl of bacterial stock into 150 ml of LB medium containing carbenicillin (50 µg/ml) and incubating overnight in a shaker at 37 °C for 16-18 h. The plasmid DNA was then extracted using a Plasmid Maxi Kit (Qiagen).

### **Cell Culture**

H1 hESCs were maintained under feeder-free conditions in mTeSR1 medium (Stem Cell Technologies). Prior to passaging, tissue-culture plates were coated with growth factor-reduced Matrigel (Corning) diluted in DMEM/F-12 medium (Thermo Fisher Scientific) and incubated for 30 minutes at 37 °C, 5% CO<sub>2</sub>. Cells were dissociated and passaged using the dissociation reagent Versene (Thermo Fisher Scientific).

### **Generation of Clonal Inducible Overexpression Lines**

hESC cells at 50-75% confluency from 3 wells of a 6-well plate were passaged using Versene. The cells were spun at 300 rcf for 5 minutes to obtain a cell pellet and this pellet was resuspended in a buffer containing 100 µl of P3 Nucleofector Solution (Lonza) and up to a maximum of 15 µl of a 1:1 mix of transposon vector plasmid to transposase plasmid by mass. This solution was loaded into a single Nucleovette (Lonza) and electroporated using the CB-150 pulse program on the 4D Nucleofector system (Lonza). After nucleofector run completion, 500 µl of pre-warmed mTeSR1 containing 10 µM Y27632 (Tocris Bioscience) was added to the Nucleovette and incubated at room temperature for 5 minutes. The cells were then removed from the Nucleovette using a Pasteur pipette and transferred dropwise into a 10 cm plate coated with growth-factor

reduced Matrigel as previously described and containing pre-warmed mTeSR1 with 10  $\mu$ M Y27632.

Medium was then changed daily, and 48 hours after nucleofection cells were maintained under puromycin (Thermo Fisher Scientific) selection at 0.75  $\mu$ g/ml. After approximately 7-10 days of culture post-nucleofection, colonies were large enough for clonal selection. To pick clonal lines, cells were treated with Versene for 3 minutes, Versene was aspirated and the plate was filled with DMEM/F-12 with 1% antibiotic-antimycotic (Thermo Fisher Scientific). Individual colonies were then carefully scraped under a microscope and transferred into individual wells of a 24-well plate coated with growth-factor reduced Matrigel and containing pre-warmed mTeSR1. These individually picked clones were expanded, aliquots were frozen in mFreSR (Stemcell Technologies) and validated by differentiation to relevant cell types. One validated clone from each line was chosen for further experiments. All clones were maintained in mTeSR1 under selection with puromycin at 0.75  $\mu$ g/ml.

## **2D Differentiation of Inducible Overexpression hESC lines**

Clonal lines overexpressing *NEUROD1* were differentiated following a previously described protocol (Zhang et al. 2013). Briefly, cells were passaged as single cells using Accutase (Innovative Cell Technologies) and plated in mTeSR1 at a density of  $4-5 \times 10^5$  cells per well of a 6-well plate. The following day medium was changed to DMEM/F12 containing N2 supplement (Thermo Fisher Scientific), MEM non-essential amino acids (Thermo Fisher Scientific), 0.2  $\mu$ g/ml mouse laminin (Invitrogen), 10 ng/ml BDNF (Peprotech), 10 ng/ml NT3 (Peprotech), 0.75  $\mu$ g/ml puromycin and 1  $\mu$ g/ml doxycycline (Sigma Aldrich) and cells were maintained in this medium for 2 days. On day 3 of differentiation cells were re-plated on Matrigel coated wells along with mouse glial cells in Neurobasal medium (Thermo Fisher Scientific) containing Glutamax (Thermo Fisher

Scientific), B27 supplement (Thermo Fisher Scientific), 10 ng/ml BDNF, 10 ng/ml NT3 and 1 µg/ml doxycycline. From day 5 onward, 2 µM Ara-c (Sigma Aldrich) was added to the medium to inhibit astrocyte proliferation. 50% of the medium was subsequently changed every 2-3 days. Cells were maintained in culture for up to 3 weeks. For functional characterization and electrical measurements, cells were plated on Matrigel coated 6-well multi-electrode arrays (Axion Biosystems) with mouse glial cells and maintained in culture for up to 3 weeks.

Clonal lines overexpressing *ASCL1* and *DLX2* were differentiated following a previously described protocol (Yang et al. 2017). Briefly, cells were passaged as single cells using Accutase (Innovative Cell Technologies) and plated in mTeSR1 at a density of  $4-5 \times 10^5$  cells per well of a 6-well plate. The following day medium was changed to DMEM/F12 containing N2 supplement, MEM non-essential amino acids, 0.75 µg/ml puromycin and 1 µg/ml doxycycline and cells were maintained in this medium for 7-8 days, with the medium being changed every 2-3 days. 2 µM Ara-C was added to the medium on day 5 of differentiation. On day 7-8, the cells were passaged with Accutase and re-plated on Matrigel coated plates at a density of  $4 \times 10^5$  cells per well of a 6-well plate in Neurobasal medium containing Glutamax, B27 supplement, 2 µM Ara-c and 1 µg/ml doxycycline. 50% of the medium was subsequently changed every 2-3 days. From day 15 onwards, medium was supplemented with 20 ng/ml BDNF and doxycycline was removed. For functional characterization and electrical measurements, cells were plated on Matrigel coated 6-well multi-electrode arrays (Axion Biosystems) with mouse glial cells and maintained in culture for up to 5 weeks.

Clonal lines overexpressing *MYOD* and *BAF60C* were differentiated to skeletal muscle following a process similar to a previously described protocol (Albini et al. 2013). Briefly, cells were passaged as single cells using Accutase and plated at a density of  $4-5 \times 10^5$  cells per well of a 6-well plate. The following day, medium was changed to DMEM/F12 containing 15% fetal bovine serum (FBS, Thermo Fisher Scientific) and 1% anti-anti (Thermo Fisher Scientific). Medium was

exchanged every 2 days. On day 5 of differentiation, medium was changed to DMEM/F12 containing 2% horse serum (Hyclone) and 1% anti-anti. Differentiating cells were cultured for 3 weeks.

### **iMB-VO and iN-VO Generation**

hESCs were grown in one well of a 6-well plate till they were 80% confluent. This was sufficient to seed one ultra-low attachment (ULA) 96-well plate of embryoid bodies. To passage the cells, mTeSR was aspirated and the cells washed with PBS. 1 mL of Accutase was then added to the well and incubated at 37 °C incubator for 4-6 minutes. Cells were detached by tapping the sides of the plate. 1 mL of mTeSR was then added to the well, and the detached cells were titrated with a 200 µl pipette to break up cell clumps and to obtain a single cell suspension. Cells were then spun down at 300 rcf for 5 minutes. Once the cells were pelleted, the supernatant was removed, and cells resuspended in EB medium - (DMEM-F12, 20% KOSR) + 50 µM Y-27632 - at a concentration of 72,000 cells/ml. 125 µL of this cell suspension, was dispensed into each well of an ULA 96 well plate. hESCs were cultured overnight at 37 °C, 5% CO<sub>2</sub>, allowing them to aggregate into embryoid bodies (EBs).

EBs were grown for 1-3 days till 200-400 µm in diameter. Once this size, EBs were transferred into an ULA 6-well plate using a cut 200 µL pipette tip, with a maximum of ~24 EBs per well of the ULA 6 well plate. Excess EB medium was carefully removed and 2 mL of Mesoderm Induction Media: N2/B27 medium - (1:1 DMEM/F12-Neurobasal, 100x N2, 50x B27) - + 3 µM CHIR (Tocris), 30 ng/mL BMP4 (Peprotech), 1 µg/ml of doxycycline (dox); was added to each well. These were then cultured at 37 °C, 5% CO<sub>2</sub> for 3 days.

Three days later, the medium was replaced with 2 mL of Vascular Induction Media: N2/B27 medium + 100 ng/ml VEGF (Peprotech) + 10 µM Forskolin (Sigma-Aldrich) + 1 µg/ml dox per

well; and cultured at 37 °C, 5% CO<sub>2</sub>. 24 hours later, medium was removed and replaced with 2 mL of N2/B27 media + 100 ng/ml VEGF + 10 μM Forskolin + 1 μg/ml dox per well. Organoids were then cultured at 37 °C, 5% CO<sub>2</sub> for 24 hours.

Organoids were then encapsulated in a blend of matrigel and collagen (Mat-Col gel: 2 mg/mL Collagen (Advanced Biomatrix) + 20% Matrigel). Briefly, parafilm wells were prepared by placing a piece of parafilm onto an empty 200 μL pipette tip box, and pressing into the tip cavities to create dimples. A 7 x 7 grid of wells was found to be optimal since it prevented organoids from drying and allowed sufficient organoids to be encapsulated for culturing in one 10 cm dish. The dimpled parafilm was then placed in a 10 cm dish. The Mat-Col Gel Blend was prepared and placed on ice.

Using a cut 200 μL pipette tip, organoids were transferred from the ULA 6 well plate, and placed individually into the parafilm wells. A maximum of ~30 μL of media was transferred with each organoid to avoid overfilling of the parafilm well. Once all organoids were placed in individual wells, excess media was removed, leaving only the organoid in the well. 30 μL of the Mat-Col gel was added to each parafilm well. Individual organoids were checked to ensure encapsulation in the gel solution, and the 10 cm dish was then incubated at 37 °C, 5% CO<sub>2</sub> for 45 minutes for the gel blend to completely gelate.

Once gelation was complete, the encapsulated organoids were washed off the parafilm using Vascular Maturation Media: StemPro 34 Media + 15% FBS + 100 ng/ml VEGF + 100 ng/ml bFGF + 1 μg/ml dox. Once gel droplets were completely washed off from the parafilm, a cut 1000 μL pipette tip was used to transfer the organoids back to the original ULA 6 well plate used in the previous steps of the experiment. Organoids were then cultured at 37 °C, 5% CO<sub>2</sub> and medium replaced every 3 days using Vascular Maturation Media until day 15.

For long term culture of iN-VOs, at day 15, medium was changed to Vascular Maturation Media + 20 ng/ml BDNF + 20 ng/ml NT3 + 1 µg/ml dox. Medium was replaced every 3-5 days.

## **Animals**

Housing, husbandry and all procedures involving animals used in this study were performed in compliance with protocols (#S16003) approved by the University of California San Diego Institutional Animal Care and Use Committee (UCSD IACUC). Mice were group housed (up to 4 animals per cage) on a 12:12 hr light-dark cycle, with free access to food and water in individually ventilated specific pathogen free (SPF) cages. All mice used were healthy and were not involved in any previous procedures nor drug treatment unless indicated otherwise. All studies performed in NOD.Cg-Prkdcscid Il2rgtm1Wjl/SzJ (NSG) mice and maintained in autoclaved cages.

## **In Vivo Perfusion**

iN-VOs were cultured for 30 days before being implanted subcutaneously into Rag2<sup>-/-</sup>;γc<sup>-/-</sup> immunodeficient mice. To prepare the mice for subcutaneous implantation, the right hind-flank region was shaved and wiped down with povidone-iodine. Then, a one-inch, subcutaneous incision was made, and Day 30 iN-VOs suspended in Matrigel were placed inside the incision region using a cut pipette tip. These organoids were then matured for an extra 30 days in-vivo. To test for proper perfusion of the vasculature, mice were given an intravenous injection of lysine fixable Texas-Red Dextran (1.25 mg per mouse, Thermo Fisher Scientific) and sacrificed after 15 minutes of allowing the dextran to pass through circulation. Organoids were retrieved from the subcutaneous region, fixed and whole-mount stained, as described below.

## **MEA Measurements**



For 2D differentiated neurons, cells were plated on Matrigel coated 6-well multi-electrode arrays (CytoView MEA 6, Axion Biosystems) with mouse glial cells and maintained in culture for up to 3 weeks.

iN-VOs were not encapsulated in Mat-Col gel when preparing them for MEA measurements. MEA electrodes (CytoView MEA 6, Axion Biosystems) were spot-coated with 2% Matrigel and placed in a cell-culture incubator to incubate at 37 °C overnight. Because gel encapsulation prevented proper adhesion between the organoid and MEA well, the following day, one day-25 un-encapsulated iN-VO was carefully put in the center of the MEA well with ~50  $\mu$ L of media. The organoid was left untouched for 2 hours, and then flooded with 0.5 mL of media. PBS was filled in the side compartments of the MEA plate to prevent cell media evaporation. The MEA plates were then left undisturbed for 5 days to ensure robust attachment to the well. MEA measurements were taken on day 30, 5 days after seeded onto the plate. To collect measurements, MEA plates were placed in the reader with the reader plate heater set to 37 °C and under 95% O<sub>2</sub>/5% CO<sub>2</sub> air flow. Plates were allowed to equilibrate under these conditions for a minimum of 5 minutes before collecting spontaneous recordings for 4 minutes.

Electrical signals were collected and analyzed using AxIS Software (Axion Biosystems) with Spontaneous Neural configuration. Signals were filtered with a band-pass filter of 200 Hz – 3 kHz. Spikes were detected with AxIS software using an adaptive threshold crossing set to 5.5 times the standard deviation of the estimated noise for each electrode.

### ***In vitro* electrical stimulation**

To create chambers for electrical stimulation, custom designed chips consisting of a porous inner well and a solid outer well were fabricated via extrusion printing of a silicone elastomer (Dow Corning Dowsil SE 1700) on glass slides, on a custom 3D printer consisting of a three-axis gantry

(AGB 10000, Aerotech) and pneumatic dispensers (Nordson Ultimius I). Chips were cured for at least two hours at 80 °C to fully crosslink the elastomer. Graphite rods were then inserted into these chips such that they were located at either end of the inner well and gaps were sealed with PDMS (Dow Corning, Sylgard 184). After sealing, chips were again cured for at least two hours at 80 °C.

To encapsulate iMB-VOs, a solution composed of Fibrin (3 mg/ml, Sigma Aldrich) + 20% Matrigel was prepared similarly to a previously described protocol (Rao et al. 2018). Up to five individual organoids were transferred into the inner well, excess medium removed and the space filled with the hydrogel mixed with thrombin (1 U/ml, Sigma-Aldrich). The hydrogel was allowed to fully gelate and crosslink at 37 °C for one hour, after which the outer well was filled with VO culture medium containing 1 µg/ml dox. For stimulated samples, wires were attached to the graphite rods and routed to Arduino Uno microcontrollers equipped with Motor Shields. The microcontrollers were programmed to provide chronic electrical stimulation at 0.4 V/mm, 1 Hz with a 2 ms on time. Encapsulated organoids were then cultured in 37 °C, 5% CO<sub>2</sub> for eight days. On the second day after encapsulation, electrical stimulation was started and maintained for one week.

### **Immunostaining**

Organoids were removed from the culture dish and added to a 1.5 mL centrifuge tube. Up to 20 organoids could be combined into one tube and used in subsequent steps. Excess medium was removed and organoids were washed once with 1 mL PBS. PBS was removed and 500 µL of 4% PFA solution was added to the microcentrifuge tube. Organoids were fixed at room temperature for 1 hour, protected from light. After 1 hour, PFA solution was removed and exchanged with 500 µL PBS. At this point, organoids could be stored in PBS at 4 °C protected from light for up to 1 month.

To block the organoids, and prepare them for immunostaining, PBS was removed and 500  $\mu\text{L}$  of blocking buffer (3% FBS, 1% BSA, 0.5% Triton-X, 0.5% Tween) was added. The tube was placed into a tube rack and then onto an orbital shaker, shaking at 150 rpm for 2 hours to fully block and permeabilize the organoids. Blocking buffer was then removed and 100  $\mu\text{L}$  of primary antibody diluted in blocking buffer was added. All antibodies used were diluted 1:100 in blocking buffer. The tube then was placed back onto the tube rack and onto an orbital shaker (LSE Orbital Shaker, Corning) at 4 °C. The orbital shaker was set to 12 rpm and organoids incubated at 4 °C overnight.

After overnight incubation, blocking buffer was removed, and organoids washed with PBS-T (PBS + 0.05% Tween) three times for 20 minutes. Organoids were placed on an orbital shaker set to 150 rpm during each PBS-T wash.

After washing in PBS-T, 100  $\mu\text{L}$  of secondary antibodies diluted in blocking buffer were added. Organoids were incubated with the secondary antibodies at room temperature for 2 hours, while keeping the samples protected from light. After secondary staining was complete, organoids were washed with PBS-T three times for 20 minutes. Organoids were placed on an orbital shaker set to 150 rpm during each PBS-T wash.

Once secondary staining was complete, a coverslip was prepared for whole-mounting of the organoids. This was done by applying epoxy (Loctite Epoxy) to the non-adhesive surface of an iSpacer (Sunjin Lab) and then attaching the iSpacer to a coverslip. Within 5 minutes the iSpacer was bound to the coverslip. Using a cut 1000  $\mu\text{L}$  pipette tip, 2-4 organoids were transferred to each iSpacer well. Excess PBS was removed and 50  $\mu\text{L}$  of Fluomount G was added to each well. iSpacer cover was then peeled off and a second coverslip attached the exposed sticky side. Whole-mount samples could be stored in 4 °C protected from light for up to 8 months. Confocal images were taken using a LSM 880 with Airyscan Confocal Microscope (Zeiss).

All of the Primary and Secondary Antibodies used in this protocol are diluted in Blocking Buffer at a 1:100 dilution factor. anti-VE-Cadherin (D87F2, Cell Signaling Technologies), anti-MAP2 (HM-2, Sigma-Aldrich), anti-MYH (MF-20, DSHB), anti-PDGFR (AF385, R&D Systems) and anti-SMA (MAB1420, R&D Systems) were used for primary antibody staining. anti-Rabbit Alexa 405 (Thermo Fisher Scientific, A-31556), anti-Rabbit DyLight 550 (Thermo Fisher Scientific, 84541), and anti-Mouse Alexa 647 (Thermo Fisher Scientific, PIA32728) were used for secondary antibody staining.

For endothelial function Dil-acetylated low-density lipoprotein (Dil-ac-LDL) uptake assay, neurovascular organoids were incubated with with 10  $\mu\text{g ml}^{-1}$  Dil-ac-LDL (Thermofisher, L3484) for 6 hours and then washed several times in medium before immunostaining and imaging.

### **RNA Extraction and qRT-PCR**

RNA was extracted from cells using the Qiazol and RNeasy Mini Kit (Qiagen) as per the manufacturer's instructions. The quality and concentration of the RNA samples was measured using a spectrophotometer (Nanodrop 2000, Thermo Fisher Scientific). cDNA was prepared using the Protoscript II First Strand cDNA synthesis kit (New England Biolabs) in a 20  $\mu\text{l}$  reaction and diluted up to 1:2 with nuclease-free water.

qRT-PCR reactions were setup as: 2  $\mu\text{l}$  cDNA, 400 nM of each primer, 2X iTaq Universal SYBR Supermix (Bio-Rad), H<sub>2</sub>O up to 20  $\mu\text{l}$ . qRT-PCR was performed using a CFX Connect Real Time PCR Detection System (Bio-Rad) with the thermocycling parameters: 95 °C for 3 min; 95 °C for 3 s; 60 °C for 20 s, for 40 cycles. All experiments were performed in triplicate and results were

normalized against a housekeeping gene, GAPDH. Relative mRNA expression levels, compared with GAPDH, were determined by the comparative cycle threshold ( $\Delta\Delta C_T$ ) method.

The following primers were used for qPCR reactions:

|                       |                         |
|-----------------------|-------------------------|
| MAP2 Forward primer   | CTCAGCACCGCTAACAGAGG    |
| MAP2 Reverse primer   | CATTGGCGCTTCGGACAAG     |
| TUBB3 Forward primer  | GGCCAAGGGTCACTACACG     |
| TUBB3 Reverse primer  | GCAGTCGCAGTTTTTCACACTC  |
| VGLUT2 Forward primer | GGGAGACAATCGAGCTGACG    |
| VGLUT2 Reverse primer | TGCAGCGGATACCGAAGGA     |
| VGAT Forward primer   | ACGTCCGTGTCCAACAAGTC    |
| VGAT Reverse primer   | AAAGTCGAGGTCGTCGCAATG   |
| BRN2 Forward primer   | AAGCGGAAAAAGCGGACCT     |
| BRN2 Reverse primer   | GTGTGGTGGAGTGCCCTAC     |
| FOXG1 Forward primer  | CCGCACCCGTCAATGACTT     |
| FOXG1 Reverse primer  | CCGTCGTAAAACCTGGCAAAG   |
| CDH5 Forward primer   | AAGCGTGAGTCGCAAGAATG    |
| CDH5 Reverse primer   | TCTCCAGGTTTTCGCCAGTG    |
| VEPTP Forward primer  | ACAACACCACATACGGATGTAAC |

|                       |                          |
|-----------------------|--------------------------|
| VEPTP Reverse primer  | CCTAGCAGGAGGTAAAGGATCT   |
| SMA Forward primer    | GTGTTGCCCTGAAGAGCAT      |
| SMA Reverse primer    | GCTGGGACATTGAAAGTCTCA    |
| MYH1 Forward Primer   | ATCTAACTGCTGAAAGGTGACC   |
| MYH1 Reverse Primer   | TAAGTAAATGGAGTGACAAAG    |
| MYH2 Forward Primer   | GCCGAGTCCCAGGTCAACAAG    |
| MYH2 Reverse Primer   | TGAGCAGATCAAGATGTGGCAAAG |
| MYH7 Forward Primer   | CTGTCCAAGTTCCGCAAGGT     |
| MYH7 Reverse Primer   | TCATTCAAGCCCTTCGTGCC     |
| CASQ1 Forward Primer  | ACATTGTGGCCTTCGCAGAG     |
| CASQ1 Reverse Primer  | CCATACGCTATCCGCATCAGT    |
| SERCA1 Forward Primer | GAAGGGAGCACAAATGGAGGC    |
| SERCA1 Reverse Primer | CAGGCCAGCACGAAGGAAAT     |

## Statistics

All statistics on gene expression qPCR plots were assayed via an unpaired two-tailed t-test. P values were assessed as significant as follows:  $**P \leq 0.01$ ,  $***P \leq 0.001$ , and  $****P \leq 0.0001$ ; ns = not significant. Statistical analysis was carried out using GraphPad Prism 8.

## **Single cell RNA-seq Processing**

To dissociate organoids for single cell RNA-seq, 5-6 organoids were incubated in a 1 mL 20 U/mL Papain solution (Worthington, LS003126) for 30 minutes, passed through a 40  $\mu$ m filter, spun down at 300 rcf for 5 minutes, and resuspended in 0.04% BSA solution. Cells were then loaded into the Chromium Chip B (10x Genomics) and single cell libraries were made using Chromium Single Cell 3' Reagent Kits v3 workflow (10x Genomics). Fastq files were aligned to a hg19 reference and expression matrices generated using the count command in cellranger v3.0.1 (10X Genomics).

## **Data Integration and Clustering**

Data integration was performed on the expression matrices from all 3 organoids: iN-VOs induced for 15 days; iN-VOs induced for 45 days; and iN-VOs which were not induced. Integration was done using the Seurat v3 pipeline (Butler et al. 2018). Expression matrices were filtered to remove any cells expressing less than 200 genes or expressing greater than 10% mitochondrial genes. DoubletFinder (McGinnis, Murrow, and Gartner 2019) was used to detect predicted doublets, and these were removed for downstream analysis. The expression matrix was then normalized for total counts, log transformed and scaled by a factor of 10,000 for each sample, and the top 4000 most variable genes were identified. We then used Seurat to find anchor cells and integrated all data sets, obtaining a batch-corrected expression matrix for subsequent processing. This expression matrix was scaled, and nUMI as well as mitochondrial gene fraction was regressed out. Principal component analysis (PCA) was performed on this matrix and 22 PCs were identified as significant using an elbow plot. The 22 significant PCs were then used to generate a k-nearest neighbors (kNN) graph with k=10. The kNN graph was then used to generate a shared nearest neighbors (sNN) graph followed by modularity optimization to find clusters with a resolution parameter of 0.8.

To classify cell types, the integrated dataset was mapped to annotated cell types in the Microwell-seq Mouse Cell Atlas (Han et al. 2018) using Seurat label transfer on the intersection of genes in the mouse and organoid datasets, and further refined using cell type-specific marker genes. We finally visualized the results using UMAP dimensionality reduction on the first 22 PCs.

To assess tissue-specificity of endothelial cells, the endothelial cell cluster was subsetted and mapped using Seurat label transfer to tissue-specific endothelial cells from the Tabula Muris consortium. To confirm neuronal character of neurons from the neurovascular organoids, the neuron cluster was subsetted and mapped via Seurat label transfer to cells profiled during differentiation of neurons from pluripotent stem cells in 2D using *NGN2* overexpression. For all mapping to a reference data set, the prediction score is assessed as the mean of the Seurat predicted identity score across all cells with a particular identity.



## SUPPLEMENTAL NOTES

### Note S1: Optimization of organoid composition cell ratio

We sought to assess whether iN hESCs would differentiate to neurons when *NEUROD1* expression was induced by doxycycline under the culture conditions of vascular organoid differentiation. Since we did not know a priori if all iN cells would differentiate to neurons and disrupt formation of vascular networks in the organoid, we first tested induced neuro-vascular organoid (iN-VO) formation with two ratios of iN:Wild-Type (WT) cells, either 100% iN cells or a mix of 50% iN cells and 50% WT cells (**Figure S1a**). Induced organoids (+dox conditions) for both cell ratios showed a marked increase in *MAP2* expression, with expression levels 4- to 8-times higher compared to uninduced organoids (-dox conditions) (**Figure S1b**), suggesting robust neuronal differentiation under dox induction.

### Note S2: Optimization of neuro-vascular organoid media conditions for long-term organoid growth

When cultured in standard VO vascular organoid media conditions, neuronal survival was compromised and by day 30 there was no observable *MAP2* expression in induced organoids compared to uninduced organoids (**Figure S1f**). To enhance the long term survival of neurons in the organoids, we tested supplementing with the growth factors BDNF and NT-3, and as well as the neuronal cell culture supplement B-27. Supplements were added to the culture from day 15 onward, and organoids were assayed at day 30. In addition, we tested whether continued overexpression of *NEUROD1* beyond day 15 may lead to impaired neuronal survival by including conditions where doxycycline was removed from culture after day 15. All organoids were assayed at day 30 by qRT-PCR for *MAP2* and *CDH5* expression. We observed highest *MAP2* expression in organoids where doxycycline was retained in the medium till day 30, and the medium was supplemented with BDNF and NT-3, about 10-times higher than uninduced organoids (**Figure**

**S1f**), while maintaining similar *CDH5* expression as uninduced organoids. Thus, for subsequent long-term experiments we supplemented the culture medium with BDNF and NT-3 from day 15 onward to ensure long term survival of neurons with reliable maintenance of vascular lineages.

## REFERENCES

- Albini, Sonia, Paula Coutinho, Barbora Malecova, Lorenzo Giordani, Alex Savchenko, Sonia Vanina Forcales, and Pier Lorenzo Puri. 2013. "Epigenetic Reprogramming of Human Embryonic Stem Cells into Skeletal Muscle Cells and Generation of Contractile Myospheres." *Cell Reports* 3 (3): 661–70.
- Butler, Andrew, Paul Hoffman, Peter Smibert, Efthymia Papalexi, and Rahul Satija. 2018. "Integrating Single-Cell Transcriptomic Data across Different Conditions, Technologies, and Species." *Nature Biotechnology* 36 (5): 411–20.
- Han, Xiaoping, Renying Wang, Yincong Zhou, Lijiang Fei, Huiyu Sun, Shujing Lai, Assieh Saadatpour, et al. 2018. "Mapping the Mouse Cell Atlas by Microwell-Seq." *Cell* 172 (5): 1091–1107.e17.
- Liu, X. Shawn, Hao Wu, Xiong Ji, Yonatan Stelzer, Xuebing Wu, Szymon Czauderna, Jian Shu, Daniel Dadon, Richard A. Young, and Rudolf Jaenisch. 2016. "Editing DNA Methylation in the Mammalian Genome." *Cell* 167 (1): 233–47.e17.
- McGinnis, Christopher S., Lyndsay M. Murrow, and Zev J. Gartner. 2019. "DoubletFinder: Doublet Detection in Single-Cell RNA Sequencing Data Using Artificial Nearest Neighbors." *Cell Systems* 8 (4): 329–37.e4.
- Paik, David T., Lei Tian, Ian M. Williams, Siyeon Rhee, Hao Zhang, Chun Liu, Ridhima Mishra, Sean M. Wu, Kristy Red-Horse, and Joseph C. Wu. 2020. "Single-Cell RNA Sequencing Unveils Unique Transcriptomic Signatures of Organ-Specific Endothelial Cells." *Circulation* 142 (19): 1848–62.
- Rao, Lingjun, Ying Qian, Alastair Khodabukus, Thomas Ribar, and Nenad Bursac. 2018. "Engineering Human Pluripotent Stem Cells into a Functional Skeletal Muscle Tissue." *Nature Communications* 9 (1): 126.
- Schörnig, Maria, Xiangchun Ju, Luise Fast, Sebastian Ebert, Anne Weigert, Sabina Kanton,

- Theresa Schaffer, et al. 2021. "Comparison of Induced Neurons Reveals Slower Structural and Functional Maturation in Humans than in Apes." *eLife* 10 (January). <https://doi.org/10.7554/eLife.59323>.
- Victor, Matheus B., Michelle Richner, Tracey O. Hermanstynne, Joseph L. Ransdell, Courtney Sobieski, Pan-Yue Deng, Vitaly A. Klyachko, Jeanne M. Nerbonne, and Andrew S. Yoo. 2014. "Generation of Human Striatal Neurons by microRNA-Dependent Direct Conversion of Fibroblasts." *Neuron* 84 (2): 311–23.
- Wang, W., Y. Xue, S. Zhou, A. Kuo, B. R. Cairns, and G. R. Crabtree. 1996. "Diversity and Specialization of Mammalian SWI/SNF Complexes." *Genes & Development* 10 (17): 2117–30.
- Yang, Nan, Soham Chanda, Samuele Marro, Yi-Han Ng, Justyna A. Janas, Daniel Haag, Cheen Euong Ang, et al. 2017. "Generation of Pure GABAergic Neurons by Transcription Factor Programming." *Nature Methods* 14 (6): 621–28.
- Yusa, Kosuke, Liqin Zhou, Meng Amy Li, Allan Bradley, and Nancy L. Craig. 2011. "A Hyperactive piggyBac Transposase for Mammalian Applications." *Proceedings of the National Academy of Sciences of the United States of America* 108 (4): 1531–36.
- Zhang, Yingsha, Changhui Pak, Yan Han, Henrik Ahlenius, Zhenjie Zhang, Soham Chanda, Samuele Marro, et al. 2013. "Rapid Single-Step Induction of Functional Neurons from Human Pluripotent Stem Cells." *Neuron* 78 (5): 785–98.
